# Supplementary material
Source: PubMed Central journal article supplement (PMC1183569)
Supplement: pnas_0504183102_1.pdf [file pnas_0504183102_1.pdf]

|                     |     |                                                                                                                           |
|---------------------|-----|---------------------------------------------------------------------------------------------------------------------------|
| CMG2 (1shu)         | 44  | <u>DLYFVL</u> <u>KSG</u> <u>SVANNWIKIY</u> <u>NFVQQLAERF</u> <u>VSPERM</u> <u>RLSFI</u> <u>VPS</u> <u>SQ</u> <u>NTIIL</u> |
| $\alpha 2\delta$ -1 | 253 | DMLILVDVSG SVSGLTLKLI RTSVSEMLET LSDDDFVNVA SFNSNAQDVS                                                                    |
| $\alpha 2\delta$ -2 | 294 | DMVIIVDVSG SVSGLTLKLM KTSVCEMLDT LSDDDYVNVA SFNEKAQPVS                                                                    |
| CMG2 (1shu)         | 94  | <u>PLTG</u> ---- <u>DR</u> <u>GKISKGLEDL</u> <u>KRVSPVGETY</u> <u>IHEGLKLANE</u> <u>QIQKAG</u> -- <u>GL</u>               |
| $\alpha 2\delta$ -1 | 303 | CFQHLVQANV RNKKVLKDAV NNITAKGID YKKGFSFAFE QLLNYNVSRA                                                                     |
| $\alpha 2\delta$ -2 | 344 | CPTHLVQANV RNKKVFKEAV QGMVAKGTIG YKAGFEYAFD QLQNSNITRA                                                                    |
| CMG2 (1shu)         | 138 | KT <u>SSIIIALT</u> <u>DGKLDGLVPS</u> <u>YAEKEAKISR</u> <u>S-LGA</u> <u>SVYCV</u> <u>GVLDFEQAQL</u>                        |
| $\alpha 2\delta$ -1 | 353 | NCNKIIMLFT DG--GEERAQ EIFNKYNKDK K-VRVFRFSV GQHNYERGPI                                                                    |
| $\alpha 2\delta$ -2 | 394 | NCNKMIMMFT DG--GEDRVQ DVFEKYNWPN RTVRVFTFSV GQHNYDVTPL                                                                    |
| CMG2 (1shu)         | 187 | <u>ER</u> <u>ADSKEQ</u> <u>V</u> <u>FFVKGGFQAL</u> <u>KGIINSILAQ</u> S                                                    |
| $\alpha 2\delta$ -1 | 400 | QWMACENKGY YFEIPSIGAI RINTQEYLDV L                                                                                        |
| $\alpha 2\delta$ -2 | 442 | QWMACTNKGY YFEIPSIGAI RINTQEYLDV L                                                                                        |
