# Supplementary material
Source: PubMed Central journal article supplement (PMC1183569)

a HA-Ca<sub>v</sub>1.2/β1b/α<sub>2</sub>δ-2

α<sub>2</sub>(102-117)

HA

overlay

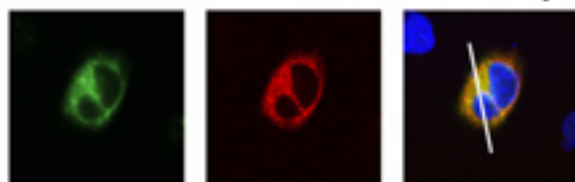

b

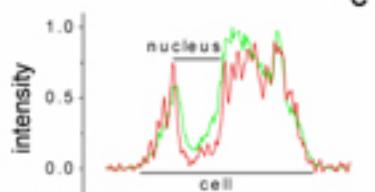

c

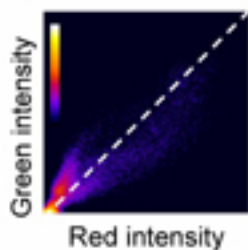

d

HA-Ca<sub>v</sub>1.2/β1b/α<sub>2</sub>δ-2 μMIDAS

α<sub>2</sub>(102-117)

HA

overlay

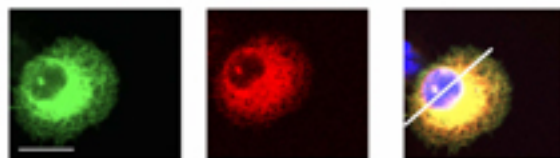

e

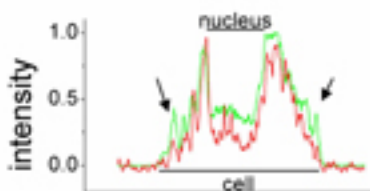

f

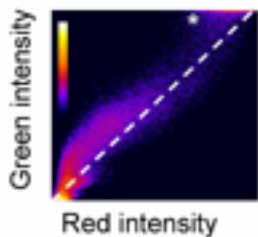

Supplement: pnas_0504183102_5.pdf [file pnas_0504183102_5.pdf]
