# Supplementary material
Source: PubMed Central journal article supplement (PMC1183569)

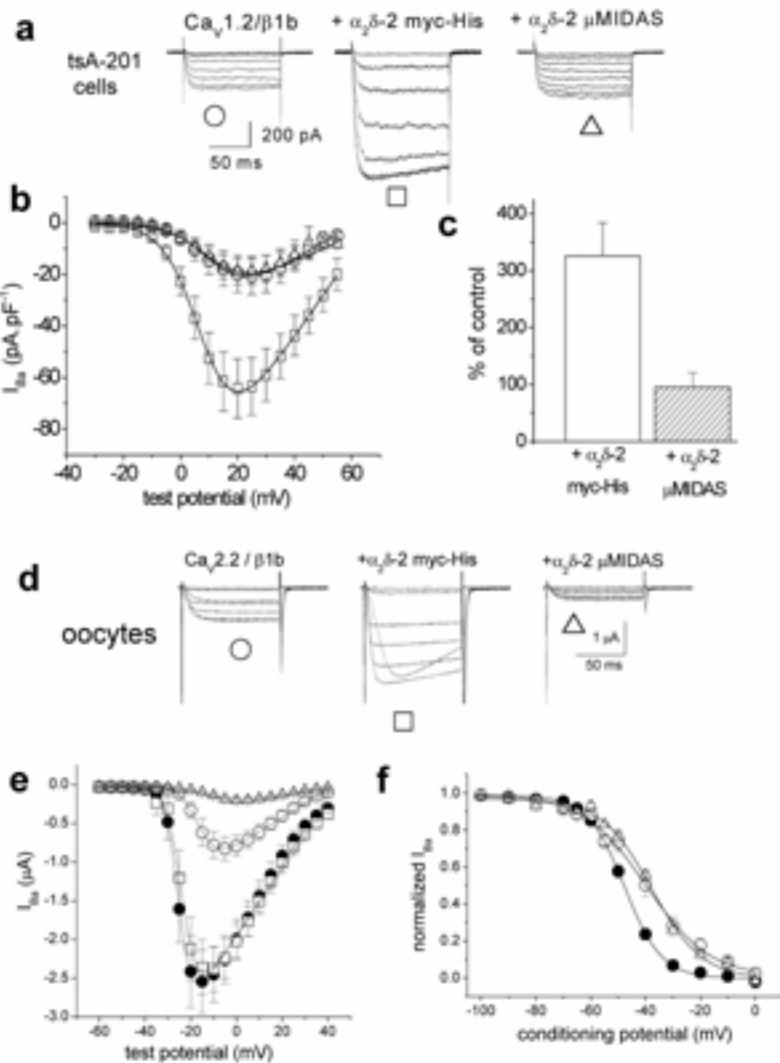

Supplement: pnas_0504183102_2.pdf [file pnas_0504183102_2.pdf]

**a** oocytes

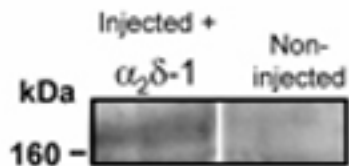

**b**

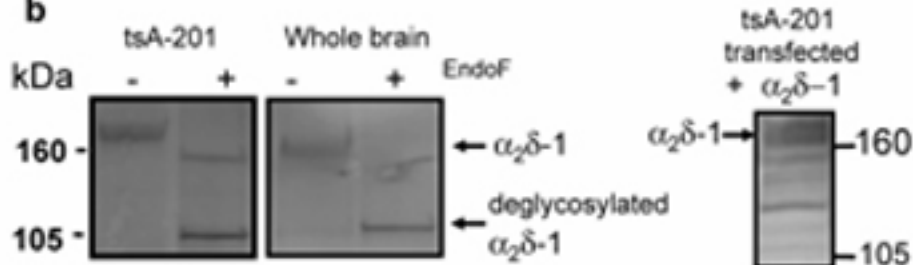

Supplement: pnas_0504183102_3.pdf [file pnas_0504183102_3.pdf]

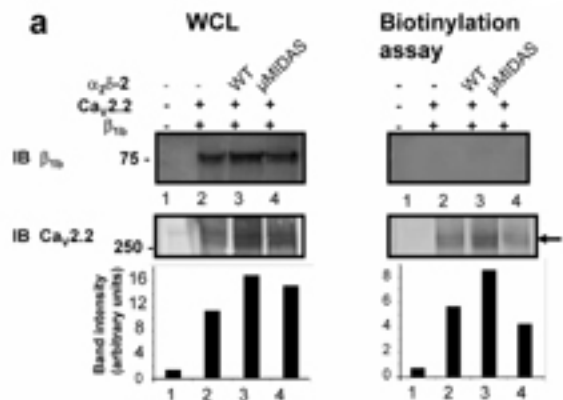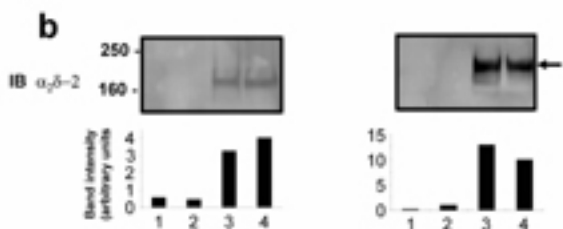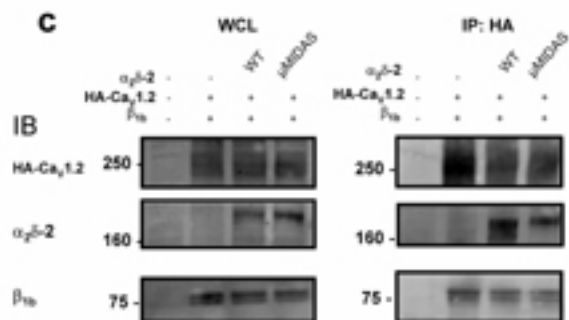

Supplement: pnas_0504183102_4.pdf [file pnas_0504183102_4.pdf]

GFP-Ca<sub>v</sub>2.2/β1b +

48 h.

$\alpha_2\delta$ -2

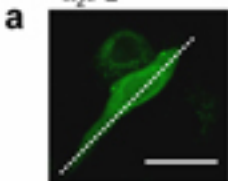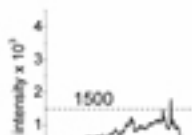

$\alpha_2\delta$ -2  $\mu$ MIDAS

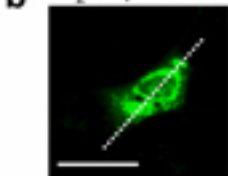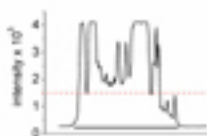

**c**

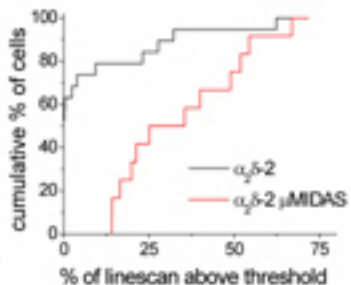

Supplement: pnas_0504183102_6.pdf [file pnas_0504183102_6.pdf]

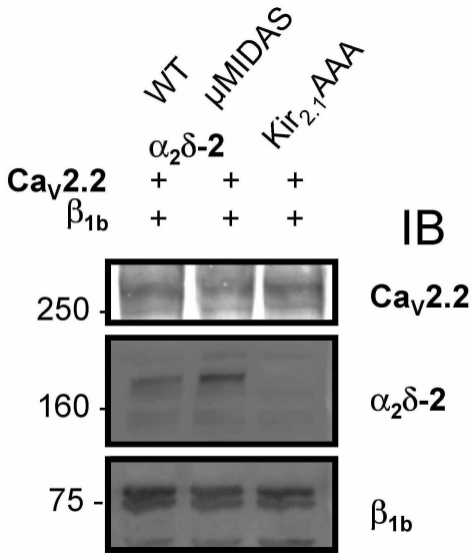

Supplement: pnas_0504183102_7.pdf [file pnas_0504183102_7.pdf]
